# Supplementary material
Source: publisher figshare collection journal article supplement (https://gsajournals.figshare.com/ndownloader/files/22364178)
Supplement: Supplementary file 1 [file 22364178]

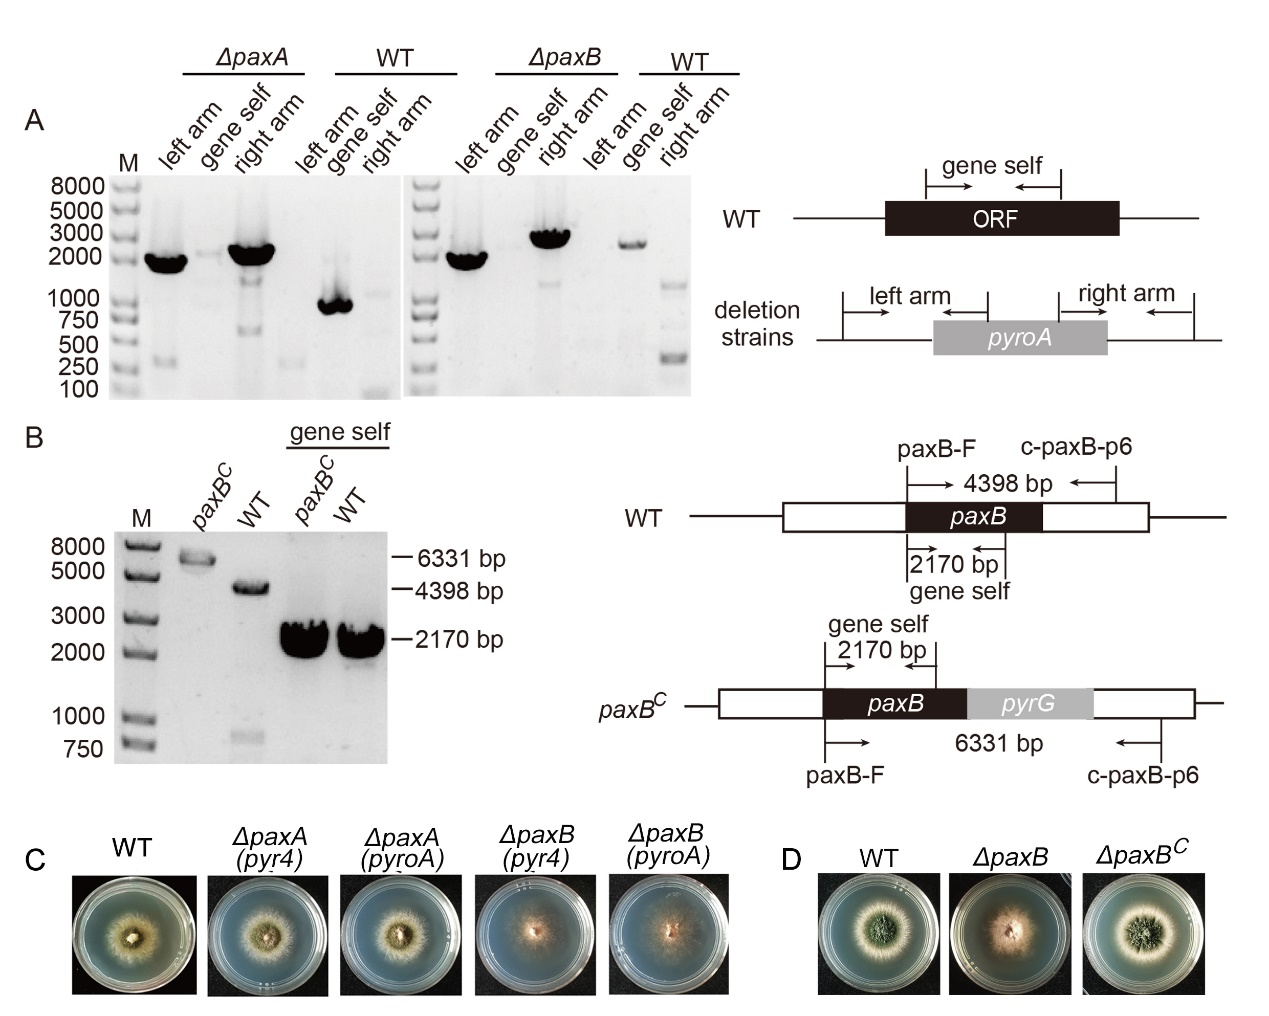


**Figure S1. Verification of related deletion strains and complementary strain**. (A) The diagnostic PCR of the deletion strains and (B) the complementation strain (ZXB13). (C) Colony morphologies of the wild-type (TN02A7), *ΔpaxA* (AAV126 and AAV156) and *ΔpaxB* (AAV127 and AAV157) strains cultured on PDRUU at 37°C for 2 days. (D) Colony morphologies of the wild-type (TN02A7), and *ΔpaxB* (AAV127) complementary (ZXB13) strains cultured on YUU at 37°C for 2 days.
